# Supplementary material for: TMT-Based Quantitative Proteomics Analysis Reveals Differentially Expressed Proteins between Different Sources of hMSCs
Source: MDPI journal article supplement (doi:10.3390/ijms241713544), 2023-08-31
Supplement: s1 [file s1]

A

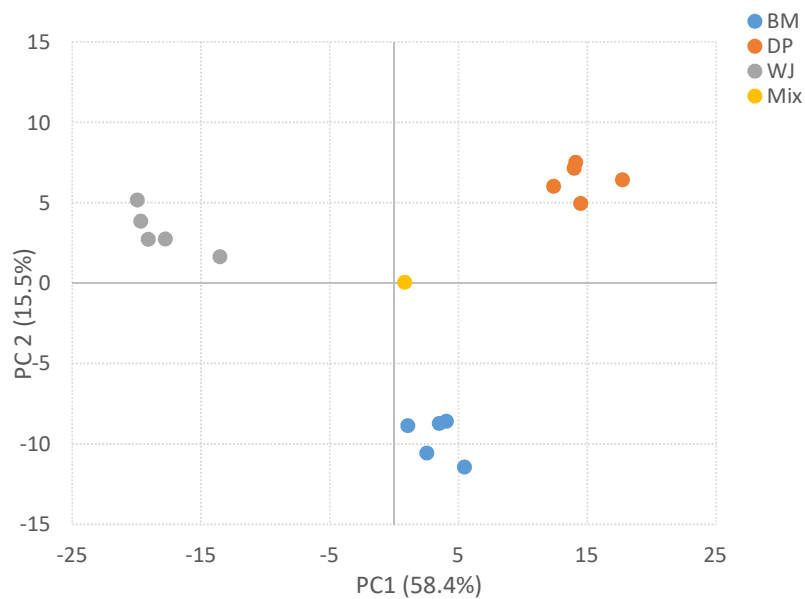

B

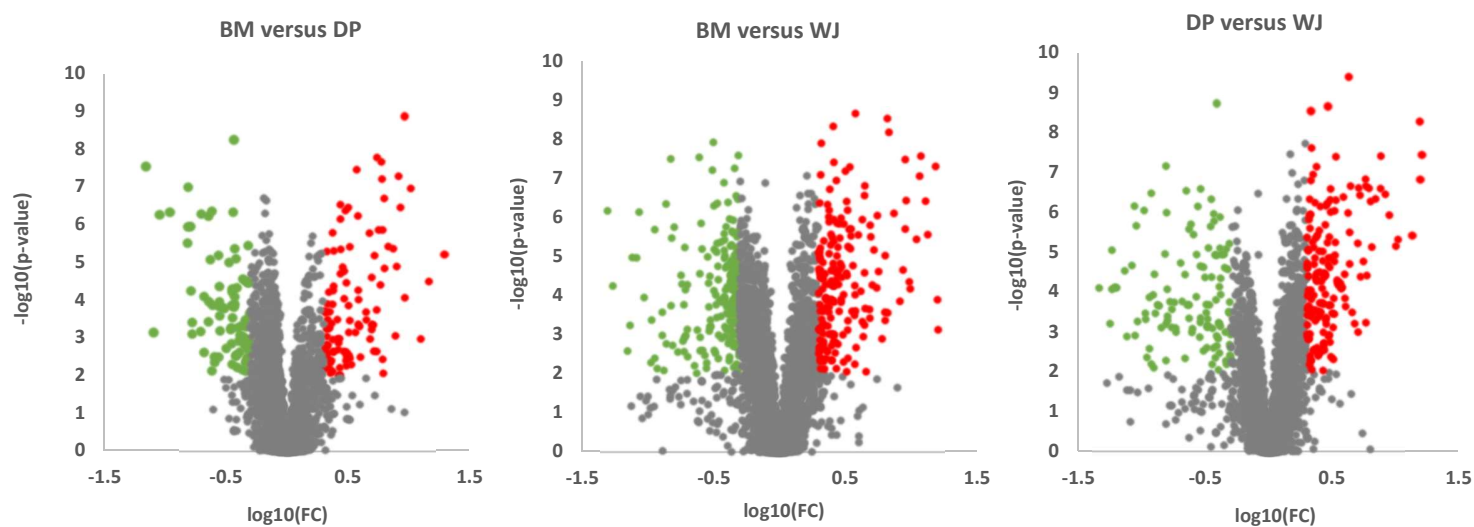

**Supplementary Figure S1. (A)** Principal component analysis (PCA) of protein abundances for all biological replicates of different sources (WJ, BM and DP) and Mix for the control. **(B)** Volcano plots of differently proteins showing the changes in proteins for BM, WJ and DP hMSCs. The DAPs were identified based on t test with p-value less than 0.05 and with a fold change  $>2$  (red) or  $<0.5$  (green).

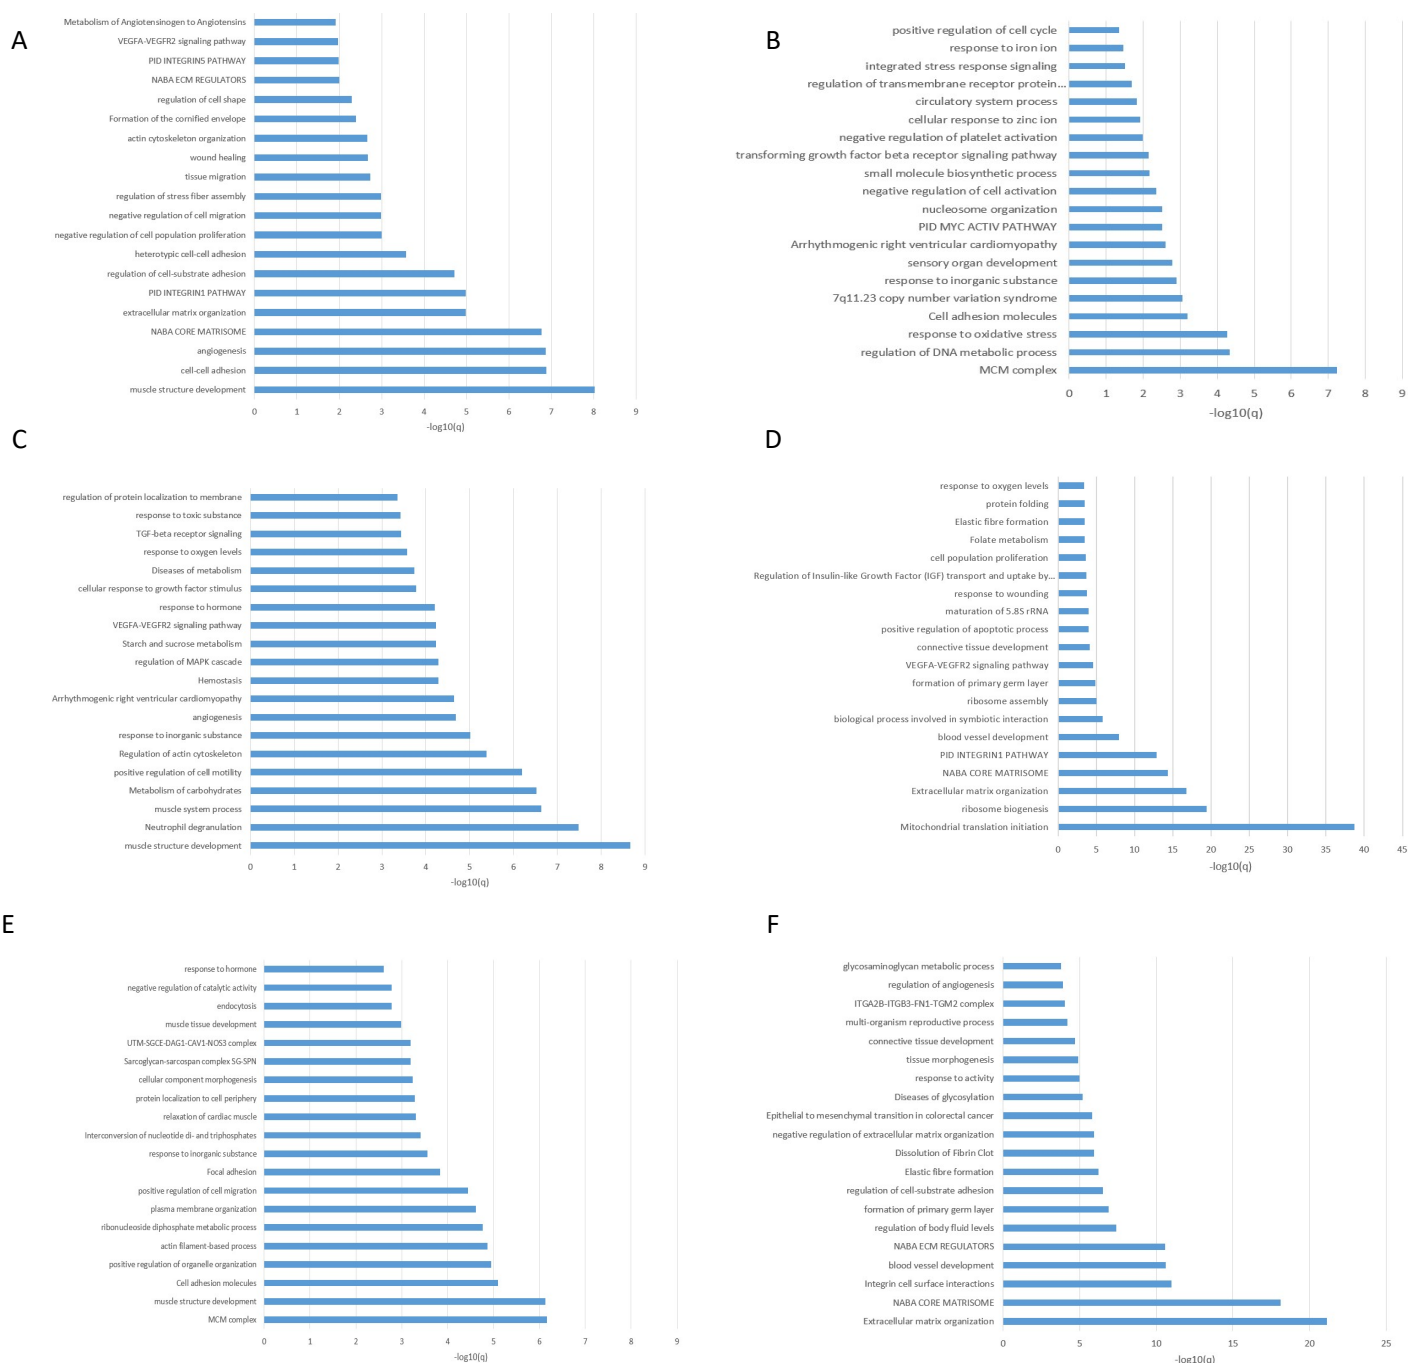

**Supplementary Figure S2.** GO (biological process) analysis using pairwise comparison of the proteins significantly up-regulated in BM *vs* DP (A), BM *vs* WJ (C), DP *vs* WJ (E) and down-regulated in in BM *vs* DP (B), BM *vs* WJ (D), DP *vs* WJ (F). q-values are calculated using the Benjamini-Hochberg procedure to account for multiple testing. Kappa scores are used as the similarity metric when performing hierarchical clustering on the enriched terms, and sub-trees with a similarity of > 0.3 are considered a cluster.

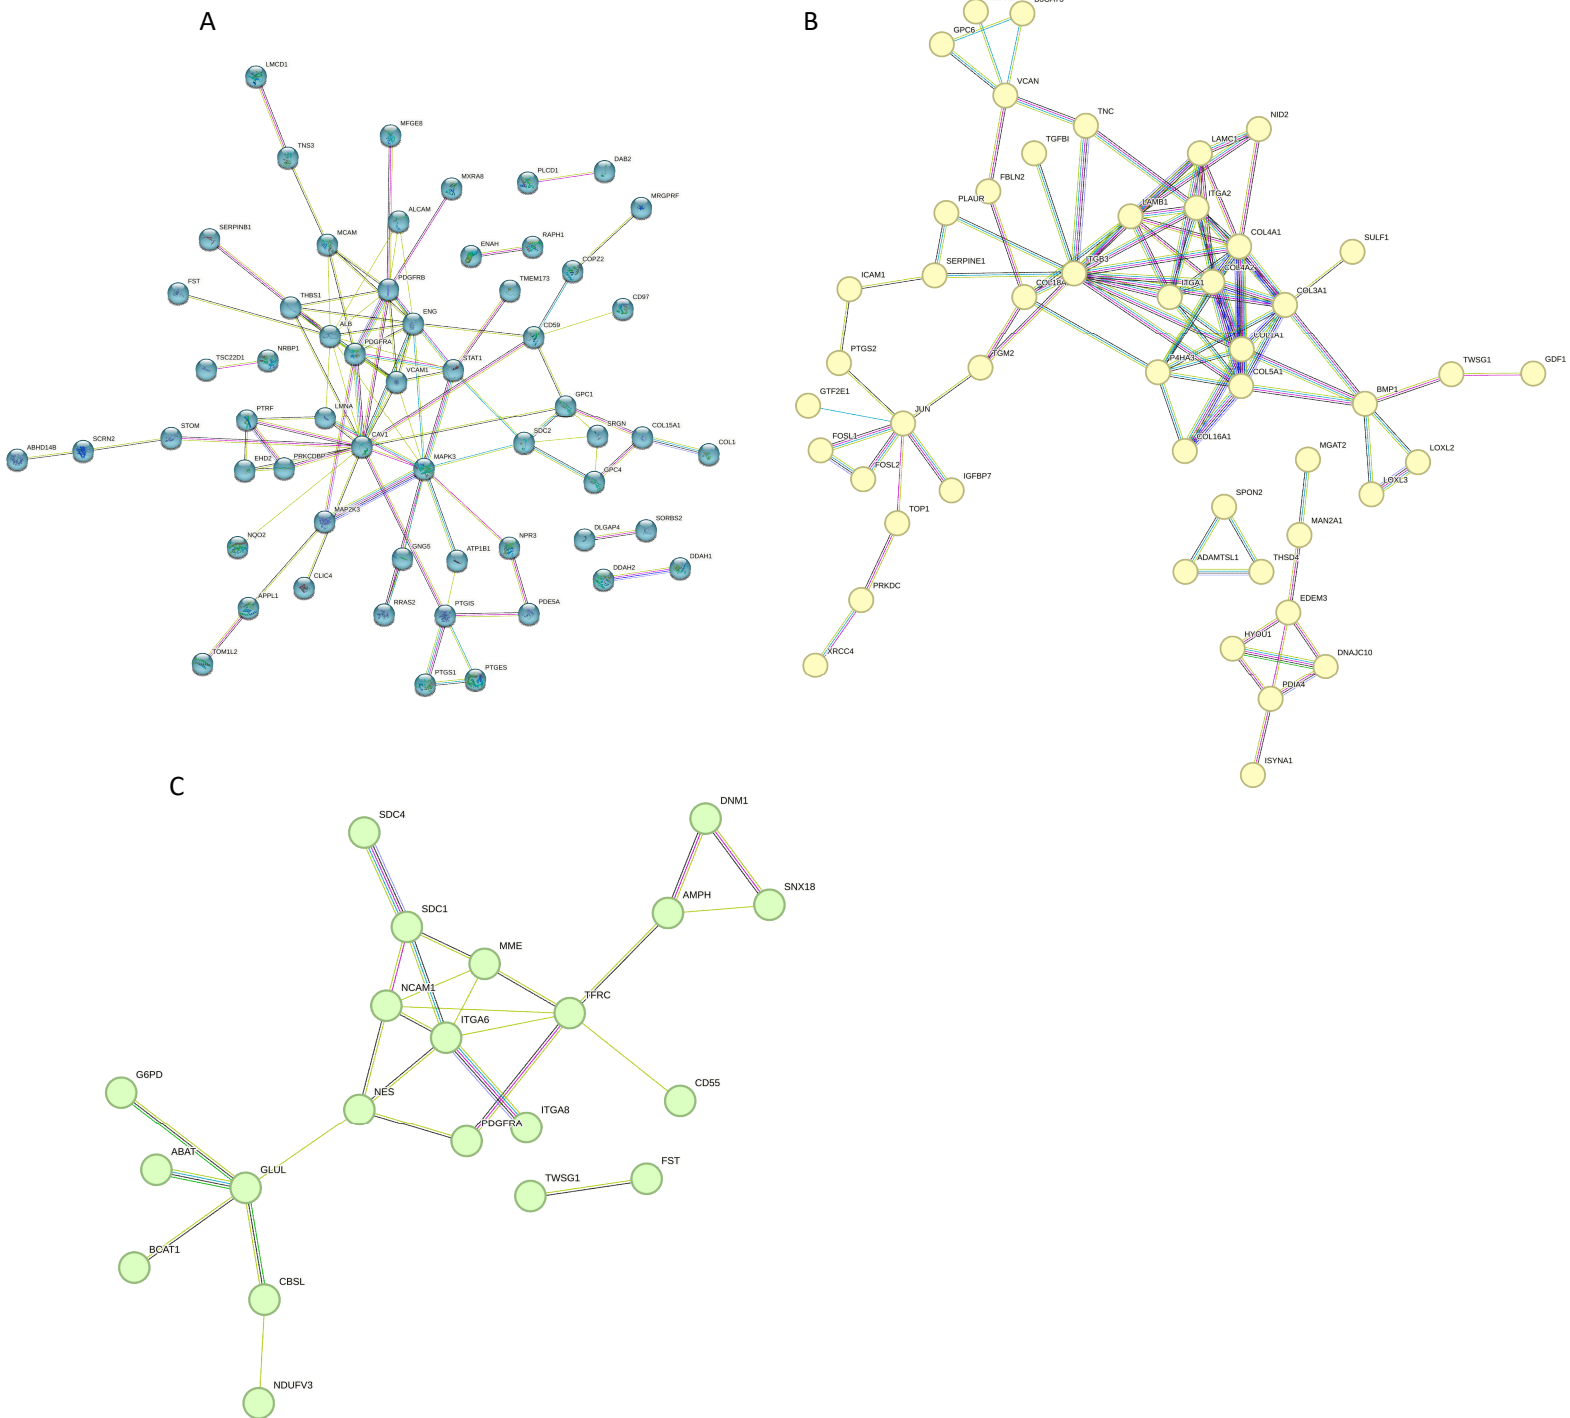

**Supplementary Figure S3.** Protein-protein interaction analysis of up-regulated proteins in BM (A), WJ (B), DP (C) hMSCs samples using STRING database (<https://string-db.org>) by setting up the parameters as *Homo sapiens* and combined confidence score greater than 0.4. WJ produced more ECM proteins and ECM-affiliated proteins. BM-MSCs display enhanced differentiation and paracrine communication capabilities. DP-MSC appeared to promote exosome production.

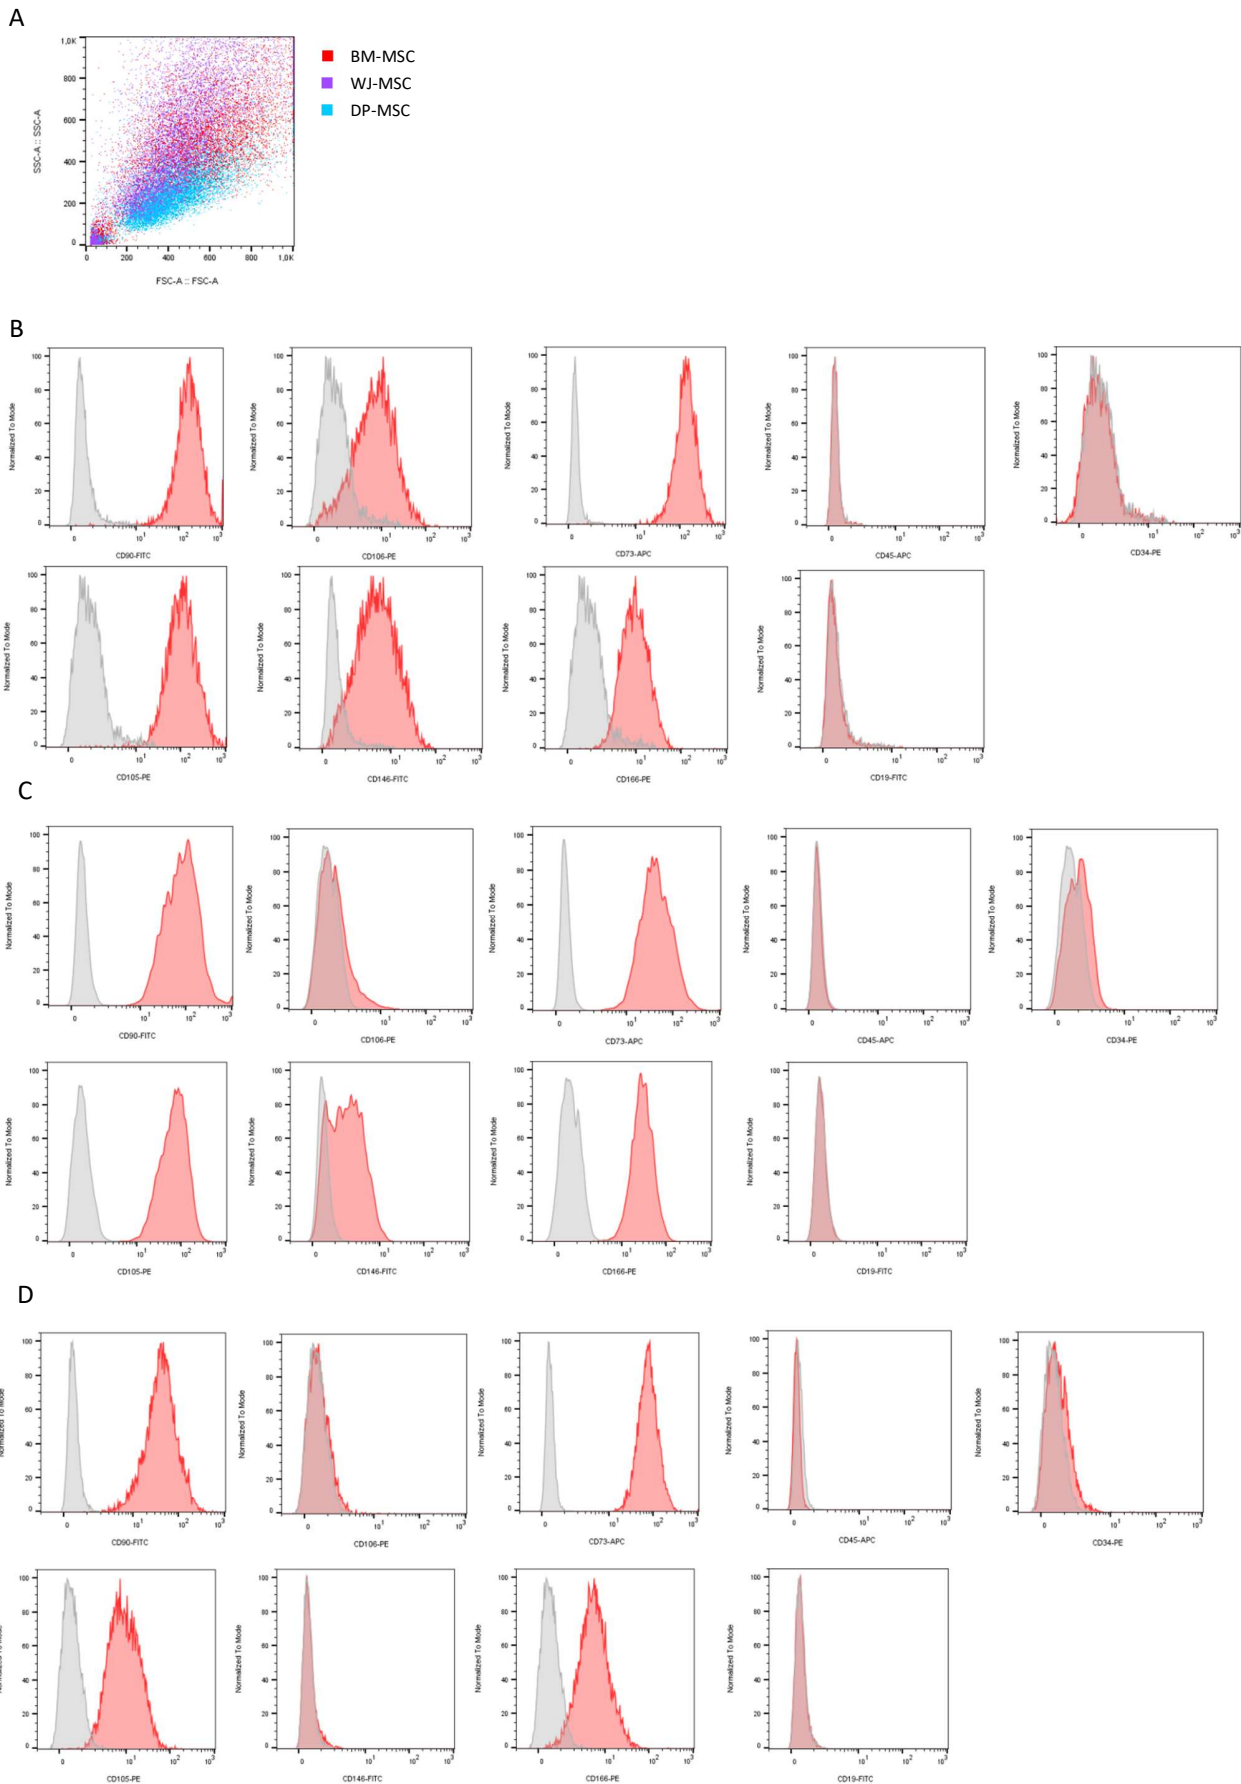

**Supplementary Figure S4.** Flow cytometric analysis of MSCs surface markers. **(A)** Gating strategy used for the identification of BM-MSc (in red), WJ-MSc (in purple) and DP-MSc (in blue). Same number of events was counted for different sources : BM-MSc **(B)**, WJ-MSc **(C)** and DP-MSc **(D)**. Positive markers (CD90, CD105 and CD73), negative markers (CD45, CD34 and CD19) and variants markers (CD106, CD146 and CD166) are shown in red, isotypes are shown in grey.
